# Variational Autoencoder: An Unsupervised Model for Modeling and Decoding fMRI Activity in Visual Cortex

Kuan Han<sup>2,3</sup>, Haiguang Wen<sup>2,3</sup>, Junxing Shi<sup>2,3</sup>, Kun-Han Lu<sup>2,3</sup>, Yizhen Zhang<sup>2,3</sup>,

Zhongming Liu<sup>\*1,2,3</sup>

<sup>1</sup>Weldon School of Biomedical Engineering

<sup>2</sup>School of Electrical and Computer Engineering

<sup>3</sup>Purdue Institute for Integrative Neuroscience

Purdue University, West Lafayette, Indiana, 47906, USA

\*Correspondence

Zhongming Liu, PhD

Assistant Professor of Biomedical Engineering

Assistant Professor of Electrical and Computer Engineering

College of Engineering, Purdue University

206 S. Martin Jischke Dr.

West Lafayette, IN 47907, USA

Phone: +1 765 496 1872

Fax: +1 765 496 1459

Email: [zmliu@purdue.edu](mailto:zmliu@purdue.edu)

## 1 **Abstract**

2           Goal-driven convolutional neural networks (CNN) have been shown to be able to predict  
3 and decode cortical responses to natural images or videos. Here, we explored an alternative deep  
4 neural network, variational auto-encoder (VAE), as a computational model of the visual cortex.  
5 We trained a VAE with a five-layer encoder and a five-layer decoder to learn visual representations  
6 from a diverse set of unlabeled images. Inspired by the “free-energy principle” in neuroscience,  
7 we modeled the brain’s bottom-up and top-down pathways using the VAE’s encoder and decoder,  
8 respectively. Following such conceptual relationships, we found that the VAE was able to predict  
9 cortical activities observed with functional magnetic resonance imaging (fMRI) from three human  
10 subjects watching natural videos. Compared to CNN, VAE resulted in relatively lower prediction  
11 accuracies, especially for higher-order ventral visual areas. On the other hand, fMRI responses  
12 could be decoded to estimate the VAE’s latent variables, which in turn could reconstruct the visual  
13 input through the VAE’s decoder. This decoding strategy was more advantageous than alternative  
14 decoding methods based on partial least square regression. This study supports the notion that the  
15 brain, at least in part, bears a generative model of the visual world.

16 **Keywords:** neural encoding, variational autoencoder, generative model, visual reconstruction

## 17 **Introduction**

18 Humans readily make sense of the visual world through complex neuronal circuits.  
19 Understanding the human visual system requires not only measurements of brain activity but also  
20 computational models with built-in hypotheses about neural computation and learning  
21 (Kietzmann, McClure and Kriegeskorte 2017). Models that truly reflect the brain's working in  
22 natural vision should be able to explain brain activity given any visual input (encoding), and  
23 decode brain activity to infer visual input (decoding) (Naselaris et al. 2011). Therefore, evaluating  
24 the model's encoding and decoding performance serves to test and compare hypotheses about how  
25 the brain learns and organizes visual representations (Wu, David and Gallant 2006).

26 In one class of hypotheses, the visual system consists of feature detectors that progressively  
27 extract and integrate features for visual recognition. For example, Gabor and wavelet filters allow  
28 extraction of such low-level features as edges and motion (Hubel and Wiesel 1962, van Hateren  
29 and van der Schaaf 1998), and explain brain responses in early visual areas (Kay et al. 2008,  
30 Nishimoto et al. 2011). More recently, convolutional neural networks (CNNs) encode multiple  
31 layers of features in a brain-inspired feedforward network (LeCun, Bengio and Hinton 2015), and  
32 support human-like performance in image recognition (Simonyan and Zisserman 2014, He et al.  
33 2016, Krizhevsky, Sutskever and Hinton 2012). Such models bear hierarchically organized  
34 representations similar as in the brain itself (Khaligh-Razavi and Kriegeskorte 2014, Cichy et al.  
35 2016), and shed light on neural encoding and decoding during natural vision (Yamins et al. 2014,  
36 Horikawa and Kamitani 2017, Eickenberg et al. 2017, Guclu and van Gerven 2015, Wen et al.  
37 2017b). For these reasons, goal-driven CNNs are gaining attention as favorable models of the  
38 visual system (Kriegeskorte 2015, Yamins and DiCarlo 2016). Nevertheless, biological learning  
39 is not entirely goal-driven but often unsupervised (Barlow 1989), and the visual system has not  
40 only feedforward (bottom-up) but feedback (top-down) connections (Salin and Bullier 1995,  
41 Bastos et al. 2012).

42 In another class of hypotheses, the visual world is viewed as the outcome of a probabilistic  
43 and generative process (Fig. 1A): any visual input results from a generative model that samples  
44 the hidden "causes" of the input from their probability distributions (Friston 2010). In light of this  
45 view, the brain behaves as an inference machine: recognizing and predicting visual input through  
46 "analysis by synthesis" (Yuille and Kersten 2006). The brain's bottom-up process analyzes visual  
47 input to infer the "cause" of the input, and its top-down process predicts the input from the brain's  
48 internal representations. Both processes are optimized by learning from visual experience in order  
49 to avoid the "surprise" or error of prediction (Rao and Ballard 1999, Friston and Kiebel 2009).  
50 This hypothesis attempts to account for both feedforward and feedback connections in the brain,  
51 align with the humans' ability to construct mental images, and offer a basis for unsupervised  
52 learning. Thus, it is compelling for both computational neuroscience (Friston 2010, Rao and  
53 Ballard 1999, Bastos et al. 2012, Yuille and Kersten 2006) and artificial intelligence (Hinton et al.  
54 1995, Lotter, Kreiman and Cox 2016, Mirza, Courville and Bengio 2016).

55 In line with this notion is the so-called variational autoencoder (VAE) (Kingma and  
56 Welling 2013). VAE uses independently distributed "latent" random variables to code the causes  
57 of the visual world. VAE learns the latent variables from images via an encoder, and samples the  
58 latent variables to generate new images via a decoder, where the encoder and decoder are both  
59 neural networks that can be trained from a large dataset without supervision (Doersch 2016).  
60 Hypothetically, VAE offers a potential model of the brain's visual system, if the brain also captures

61 the causal structure of the visual world. As such, the latent variables in VAE should match (up to  
62 linear projection) neural representations given naturalistic visual input; the generative component  
63 in VAE should enable an effective and generalizable way to decode brain activity during either  
64 visual perception or imagery (Du, Du and He 2017, Güçlütürk et al. 2017, van Gerven, de Lange  
65 and Heskes 2010a).

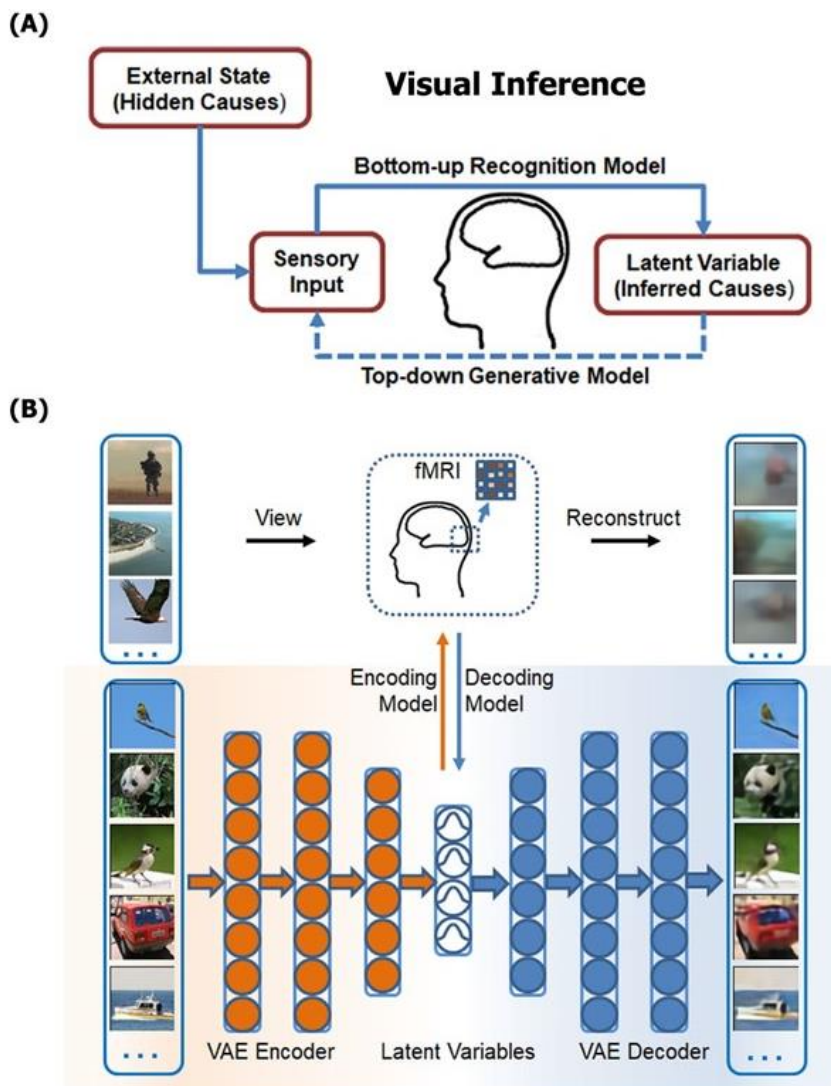

**Figure 1 | The unsupervised inference model of vision. (A) Regarding the brain as an inference machine.** The brain analyzes sensory data by approximating the causes that generate the sensations. Its bottom-up process maps from input to sensory causes and top-down process predicts the input based on inferred causes. **(B) Encoding and decoding cortical activities with variational autoencoder.** For encoding, cortical activities are predicted by using VAE responses given visual stimuli; For decoding, latent variables are predicted from fMRI measurements and mapped to visual reconstruction through VAE decoder.

66 This led us to investigate VAE as a candidate model of the visual cortex for unsupervised  
67 learning of visual representations (Fig. 1B). In this study, we addressed the relationship between

68 VAE and the brain’s “free-energy” principle (Friston 2010), and then tested the degree to which  
69 VAE could be used to predict and decode cortical responses observed with functional magnetic  
70 resonance imaging (fMRI) during naturalistic movie stimuli.

71

## 72 **Methods and Materials**

### 73 *Theory: variational autoencoder*

74 In general, variational autoencoder (VAE) is a type of deep neural networks that learns  
75 representations from complex data without supervision (Kingma and Welling 2013). A VAE  
76 includes an encoder and a decoder, both of which are implemented as neural nets. The encoder  
77 learns latent variables from the input data, and the decoder learns to generate similar input data  
78 from samples of the latent variables. Given large input datasets, the encoder and the decoder are  
79 trained together by minimizing the reconstruction loss and the Kullback-Leibler (KL) divergence  
80 between the distributions of the latent variables and independent standard normal distributions  
81 (Doersch 2016). When the input data are natural images, the latent variables represent the causes  
82 of the images. The encoder serves as an inference model that attempts to infer the latent causes of  
83 any input image; the decoder serves as a generative model that generates new images by sampling  
84 latent variables.

85 Mathematically, let  $\mathbf{z}$  be the latent variables and  $\mathbf{x}$  be images. The encoder parameterized  
86 with  $\boldsymbol{\varphi}$  infers  $\mathbf{z}$  from  $\mathbf{x}$ , and the decoder parameterized with  $\boldsymbol{\theta}$  generates  $\mathbf{x}$  from  $\mathbf{z}$ . In VAE, both  $\mathbf{z}$   
87 and  $\mathbf{x}$  are random variables. The likelihood of  $\mathbf{x}$  given  $\mathbf{z}$  under the generative model  $\boldsymbol{\theta}$  is denoted  
88 as  $p_{\boldsymbol{\theta}}(\mathbf{x}|\mathbf{z})$ . The probability of  $\mathbf{z}$  given  $\mathbf{x}$  under the inference model  $\boldsymbol{\varphi}$  is denoted as  $q_{\boldsymbol{\varphi}}(\mathbf{z}|\mathbf{x})$ . The  
89 marginal likelihood of data can be written as the following form.

$$90 \log p_{\boldsymbol{\theta}}(\mathbf{x}) = D_{KL}[q_{\boldsymbol{\varphi}}(\mathbf{z}|\mathbf{x})||p_{\boldsymbol{\theta}}(\mathbf{z}|\mathbf{x})] + L(\boldsymbol{\theta}, \boldsymbol{\varphi}; \mathbf{x}) \quad (1)$$

91 Since the Kullback-Leibler divergence in Equation (1) is non-negative,  $L(\boldsymbol{\theta}, \boldsymbol{\varphi}; \mathbf{x})$  can be regarded  
92 as the lower-bound of data likelihood and also be rewritten as Eq. (2). For VAE, the learning rule  
93 is to optimize  $\boldsymbol{\theta}$  and  $\boldsymbol{\varphi}$  by maximizing the following function given the training samples of  $\mathbf{x}$ .

$$94 L(\boldsymbol{\theta}, \boldsymbol{\varphi}; \mathbf{x}) = -D_{KL}[q_{\boldsymbol{\varphi}}(\mathbf{z}|\mathbf{x})||p_{\boldsymbol{\theta}}(\mathbf{z})] + E_{\mathbf{z} \sim q_{\boldsymbol{\varphi}}(\mathbf{z}|\mathbf{x})}[\log(p_{\boldsymbol{\theta}}(\mathbf{x}|\mathbf{z}))] \quad (2)$$

95 In this objective function, the first term is the KL divergence between the distribution of  $\mathbf{z}$   
96 inferred from  $\mathbf{x}$  and the prior distribution of  $\mathbf{z}$ , both of which are assumed to follow a multivariate  
97 normal distribution. The second term is the expectation of the log-likelihood that the input image  
98 can be generated by the sampled values of  $\mathbf{z}$  from the inferred distribution  $q_{\boldsymbol{\varphi}}(\mathbf{z}|\mathbf{x})$ . When  $q_{\boldsymbol{\varphi}}(\mathbf{z}|\mathbf{x})$   
99 is a multivariate normal distribution with unknown expectations  $\boldsymbol{\mu}$  and variances  $\boldsymbol{\sigma}^2$ , the objective  
100 function is differentiable with respect to  $(\boldsymbol{\theta}, \boldsymbol{\varphi}, \boldsymbol{\mu}, \boldsymbol{\sigma})$ , which can therefore be optimized iteratively  
101 through gradient-descent algorithms (Kingma and Welling 2013).

102 Similar concepts have been put forth in computational neuroscience theories, for example  
103 the free-energy principle (Friston 2010). In free-energy principle, the brain’s perceptual system  
104 includes bottom-up and top-down pathways. Like the encoder in VAE, the bottom-up pathway  
105 maps from sensory data to their inferred causes as probabilistic representations. Like the decoder  
106 in VAE, the top-down pathway predicts the sensation from what the brain infers as the causes of

107 sensations. Both the bottom-up and top-down pathways are optimized together, such that the brain  
 108 infers the causes of the sensory input, and generates the sensory prediction that matches the input  
 109 with the minimal error or surprise. Mathematically, the learning objectives in both VAE and free  
 110 energy principle are similar, both aiming to minimize the difference between the inferred and  
 111 hidden causes of sensory data (measured by Kullback–Leibler divergence) while maximizing the  
 112 likelihood of the sensory data given the inferred causes.

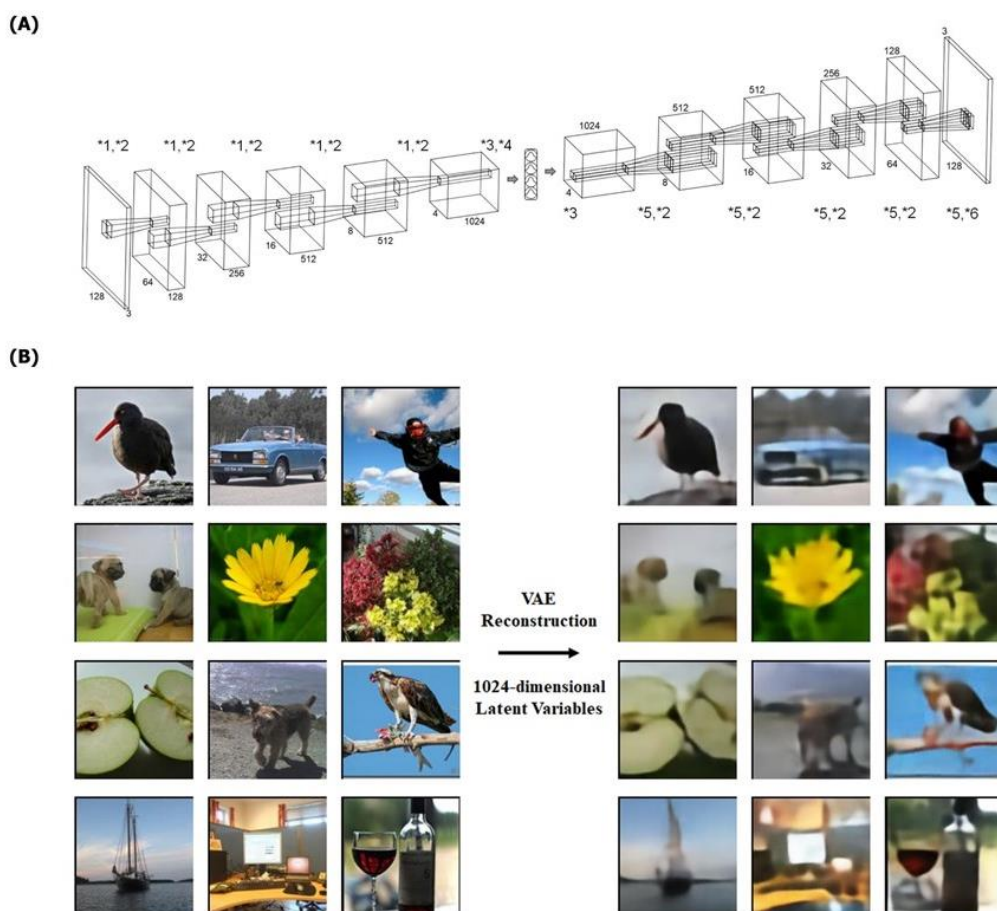

**Figure 2 | VAE architecture and reconstruction examples. (A) VAE architecture.** The encoder and the decoder both contained 5 layers. The dimension of latent variables was 1024. Operations were defined as: \*1 convolution (kernel size=4, stride=2, padding=1), \*2 rectified nonlinearity, \*3 fully connected layer, \*4 re-parameterization trick, \*5 transposed convolution (kernel size = 4, stride = 2, padding = 1), \*6 sigmoid nonlinearity. **(B) Examples of VAE reconstruction.** Each testing image was coded 1024-dimensional latent variables with VAE encoder. The reconstruction from VAE decoder (blurred images on right side) retained basic and condensed information similar to the original input (clear images on left side).

### 113 *Training VAE with diverse natural images*

114 We designed a VAE with 1,024 latent variables while the encoder and the decoder were  
 115 both convolutional neural networks with five hidden layers (Fig. 2A). Each convolutional layer  
 116 included nonlinear units with a Rectified Linear Unit (ReLU) function (Nair and Hinton 2010),  
 117 except the last layer in the decoder where a sigmoid function was used to generate normalized  
 118 pixel values between 0 and 1. The model was trained on the ImageNet ILSVRC2012 dataset

119 (Russakovsky et al. 2015). Training images were resized into  $128 \times 128 \times 3$ . To enlarge the amount  
120 of training data, the original training images were randomly flipped in the horizontal direction to  
121 yield additional training images, resulting in  $>2$  million training samples in total. The training data  
122 were divided into mini-batches with a batch size of 200. For each training example, the pixel  
123 intensities were normalized to a range from 0 to 1, such that the normalized intensity could be  
124 interpreted as the probability of color emission (Gregor et al. 2015). To train the VAE, the Adam  
125 optimizer (Kingma and Ba 2014) was used with the learning rate of  $1e-4$ . This VAE was  
126 implemented in *PyTorch* (<http://pytorch.org/>).

## 127 ***Experimental data***

128 Three healthy volunteers (all female, age: 23-26) participated in this study with informed  
129 written consent according to a research protocol approved by the Institutional Review Board at  
130 Purdue University. All experiments were performed in accordance with relevant guidelines and  
131 regulations as described in this approved protocol. As described in detail elsewhere (Wen et al.  
132 2017b), the experimental design and data were briefly summarized as below. Each subject watched  
133 a diverse set of natural videos for a total length up to 13.3 hours. The videos were selected and  
134 downloaded from Videoblocks and YouTube, and then were separated into two independent sets.  
135 One data set was for training the models to predict the fMRI responses based on the input video  
136 (i.e. the encoding models) or the models to reconstruct the input video based on the measured  
137 fMRI responses (i.e. the decoding models). The other data set was for testing the trained the  
138 encoding or decoding models. The videos in the training and testing datasets were entirely  
139 distinctive to ensure unbiased model evaluation. Both the training and testing movies were split  
140 into different 8-min segments. Each segment was used as visual stimulation ( $20.3^\circ \times 20.3^\circ$ ) along  
141 with a central fixation cross ( $0.8^\circ \times 0.8^\circ$ ) presented via an MRI-compatible binocular goggle during  
142 a single fMRI session. The training movie included 98 segments (13.1 hours) for Subject 1, and  
143 18 segments (1.6 hours) for Subject 2 & 3. The testing movie included 5 segments (40 mins in  
144 total). Each subject watched the testing movie 10 times. All five testing movies were used to test  
145 the encoding model. One of the testing movies contained video clips that were continuous over  
146 long periods (mean  $\pm$  std:  $13.3 \pm 4.8$  s) was used to test the decoding model for visual  
147 reconstruction.

148 MRI/fMRI data were collected from a 3-T MRI system, including anatomical MRI ( $T_1$  and  
149  $T_2$  weighted) of 1mm isotropic spatial resolution, and BOLD functional MRI with 2-s temporal  
150 resolution and 3.5mm isotropic spatial resolution. The fMRI data were registered onto anatomical  
151 MRI data, and were further co-registered on a cortical surface template (Glasser et al. 2013). The  
152 fMRI data were preprocessed with the minimal preprocessing pipeline released for the human  
153 connectome project (Glasser et al. 2013).

## 154 ***VAE-based encoding models***

155 The trained VAE extracted the latent representations of any video by a feed-forward pass  
156 of every video frame into the encoder, and generated the reconstruction by a feed-back pass with  
157 the decoder. To predict cortical fMRI responses to the video stimuli, an encoding model was  
158 defined separately for each voxel as a linear regression model, through which the voxel-wise fMRI  
159 signal was estimated as a function of VAE model activity (including both the encoder and the  
160 decoder) given the input video. Every unit activity in VAE was convolved with a canonical  
161 hemodynamic response function (HRF). For dimension reduction, PCA was applied to the HRF-

162 convolved unit activity for each layer, keeping 99% of the variance of the layer-specific activity  
163 given the training movies. Then, the layer-wise activity was concatenated across layers; PCA was  
164 applied to the concatenated activity to keep the 99% of the variance of the activity from all layers  
165 given the training movies. See more details in our earlier paper (Wen et al. 2017a). Following the  
166 dimension reduction, the principal components of unit-activity were down-sampled to match the  
167 frequency of fMRI and used as the regressors to predict the fMRI signal at each voxel through the  
168 linear regression model specific to the voxel.

169 The voxel-wise regression model was trained based on the data during the training movie.  
170 Mathematically, for any training sample, let  $\mathbf{x}^{(j)}$  be the visual stimuli at the  $j$ -th time point,  $\mathbf{y}_i^{(j)}$  be  
171 the fMRI response at the  $i$ -th voxel,  $\mathbf{z}^{(j)}$  be a vector representing the predictors for the fMRI signal  
172 derived from the  $\mathbf{x}$  through VAE, as described above. The voxel-wise regression model is  
173 expressed as Eq. (4).

$$174 \quad \mathbf{y}_i^{(j)} = \mathbf{w}_i^T \mathbf{z}^{(j)} + \mathbf{b}_i + \epsilon_i \quad (4)$$

175 where  $\mathbf{w}_i$  is a column vector representing the regression coefficients,  $\mathbf{b}_i$  is the bias term, and  $\epsilon_i$  is  
176 the error unexplained by the model. The linear regression coefficients were estimated using least-  
177 squares estimation with L<sub>2</sub>-norm regularization, or minimizing the loss function as Eq. (5).

$$178 \quad \langle \hat{\mathbf{w}}_i, \hat{\mathbf{b}}_i \rangle = \operatorname{argmin}_{\mathbf{w}_i, \mathbf{b}_i} \frac{1}{N} \sum_{j=1}^N \left( \mathbf{y}_i^{(j)} - \mathbf{w}_i^T \mathbf{z}^{(j)} - \mathbf{b}_i \right)^2 + \lambda_i \|\mathbf{w}_i\|_2^2 \quad (5)$$

179 where  $N$  is the number of training samples. The regularization parameter  $\lambda_i$  was optimized for  
180 each voxel to minimize the loss in three-fold cross-validation. Once the optimal parameter  $\lambda_i$  was  
181 determined, the model was refitted with the entire training set and the optimal regularization  
182 parameter to finalize the model.

183 After the above model training, we tested the voxel-wise encoding models with the testing  
184 movies. The testing movies were independent of the training movies to ensure unbiased model  
185 evaluation. The model performance was evaluated separately for each voxel as the correlation  
186 between the measured and predicted fMRI responses to the testing movie. The significance of the  
187 correlation was assessed by using a block permutation test (Adolf et al. 2014) with a block size of  
188 24-sec and 30,000 permutations and corrected at false discovery rate (FDR)  $q < 0.05$ .

### 189 *Encoding model comparison with supervised CNN*

190 We also built up a control model to predict cortical responses with supervised information.  
191 A 18-layer pretrained residual network (ResNet-18) was used as a benchmark to compare the VAE  
192 encoding performance with the performance of a supervised CNN. The model architecture was  
193 elaborated in the original ResNet paper (He et al. 2016). Briefly, ResNet-18 was consisting of 6  
194 layers: the first layer was a convolutional layer followed by max-pooling, yielding location and  
195 orientation selective features; The last layer was a logistic regression layer, yielding the  
196 classification output; The 4 intermediate layers were consisting of stacked residual blocks, yielding  
197 the progressive abstraction from low level features to semantic features. The output units of first  
198 five layers in ResNet-18 were extracted as model activities given input video. Then the unit  
199 activities were processed in the same way as the preprocessing steps of VAE.



200 The encoding accuracy of VAE was compared with supervised CNN in two ways. First,  
201 regions of interest (ROI) were selected from various levels of visual hierarchy: V1, V2, V3, V4,  
202 lateral occipital (LO), middle temporal (MT), fusiform face area (FFA), para-hippocampal place  
203 area (PPA) and temporo-parietal junction (TPJ). In each ROI, the correlation coefficient of each  
204 voxel was corrected by noise-ceiling, and then averaged over all voxels and all subjects. The  
205 averaged prediction accuracies of each ROI were compared between VAE and ResNet-18. Second,  
206 for each voxel, the voxel-wise correlation coefficient was transformed to z score through Fisher  
207 transformation for both VAE and ResNet-18. Then the difference between two models were  
208 calculated as subtracting the z score of VAE from z score of ResNet-18, yielding the voxel-wise  
209 difference in prediction accuracy.

210 The process of calculating noise-ceiling was elaborated in a previous study (Kay et al.  
211 2013). Briefly, for each subject, the noise was assumed to be zero-mean, and the variance of the  
212 noise was estimated as the mean square of standard errors in the testing data across 10 repetitions.  
213 The variance of the response was taken as the difference between the variance of the data and the  
214 variance of the noise. From the estimated signal and noise distributions, the sample of response  
215 and the sample of noise was drawn by Monte Carlo simulation. The simulated  $R^2$  value between  
216 simulated response and noisy data was calculated over 1000 repetitions, yielding the distribution  
217 of noise-ceiling of each voxel.

### 218 *VAE-based decoding of fMRI for visual reconstruction*

219 We trained and tested the decoding model for reconstructing visual input from distributed  
220 fMRI responses. The model contained two steps: 1) transforming the spatial pattern of fMRI  
221 response to latent variables through a linear regression model, 2) transforming latent variables to  
222 pixel patterns through the VAE's decoder.

223 Mathematically, let  $\mathbf{Y}^{(j)}$  be a column vector representing the measured fMRI map at the  $j$ -  
224 th time point, and  $\mathbf{z}^{(j)}$  be a column vector representing the latent variables given the unknown  
225 visual input  $\mathbf{x}^{(j)}$ . As Eq. (6), a multivariate linear regression model was defined to predict  $\mathbf{z}^{(j)}$   
226 given  $\mathbf{Y}^{(j)}$ .

$$227 \quad \mathbf{z}^{(j)} = \mathbf{U}\mathbf{Y}^{(j)} + \mathbf{c} + \boldsymbol{\varepsilon} \quad (6)$$

228 where  $\mathbf{U}$  is a weighting matrix representing the regression coefficients to transform the fMRI map  
229 to the latent variables,  $\mathbf{c}$  is the bias term, and  $\boldsymbol{\varepsilon}$  is the error term unexplained by the model. This  
230 model was estimated based on the data during the training movie, by using  $L_1$ -norm regularization  
231 least-squares estimation, or minimizing the loss function defined as below.

232 To estimate parameters of the decoding model, we minimized the objective function as Eq.  
233 (7) with  $L_1$ -regularized least-squares estimation to prevent over-fitting.

$$234 \quad \langle \hat{\mathbf{U}}, \hat{\mathbf{c}} \rangle = \arg \min_{\mathbf{U}, \mathbf{c}} \frac{1}{N} \sum_{j=1}^N (\mathbf{z}^{(j)} - \mathbf{U}\mathbf{Y}^{(j)} - \mathbf{c})^2 + \lambda \|\mathbf{U}\|_1 \quad (7)$$

235 where  $N$  is the number of data samples used for training the model. The regularization parameter,  
236  $\lambda$ , was optimized to minimize the loss in three-fold cross-validation. To solve Eq. (7), we used  
237 stochastic gradient-descent algorithm with a batch size of 100 and a learning rate of  $1e-7$ .

238 After the estimation of latent variables, the visual input in the testing movie was  
 239 reconstructed by passing the estimated latent variables through the decoder in VAE, as expressed  
 240 by Eq. (8)

$$241 \quad \hat{\mathbf{x}}^{(j)} = \theta(\hat{\mathbf{z}}^{(j)}) = \theta(\hat{\mathbf{U}}\mathbf{Y}^{(j)} + \hat{\mathbf{c}}) \quad (8)$$

242 To evaluate the decoding performance in visual reconstruction, we calculated the Structural  
 243 Similarity index (SSIM) (Wang et al. 2004) between every video frame of the testing movie and  
 244 the corresponding frame reconstructed on the basis of the decoded fMRI signals. We averaged the  
 245 SSIM over all frames in the testing movie (resampled by TR), as a measure of the spatial similarity  
 246 between the reconstructed and actual movie stimuli. In addition, we further evaluated the degree  
 247 to which color information was preserved in the movie reconstructed from fMRI data. For this  
 248 purpose, the color information at each pixel was converted from the RGB values to a single hue  
 249 value. The hue maps of the reconstructed movie frames were compared with those of the original  
 250 movie frames. Their similarity was evaluated in terms of the circular correlation (Berens 2009,  
 251 Jammalamadaka and Sengupta 2001). Hue values in the same frame were flattened into a vector  
 252 and the hue vectors of different frames were concatenated sequentially as a monolithic vector  
 253 including all testing frames. Then the circular correlation of monolithic hue vectors between  
 254 original and reconstructed frames for each subject was calculated. The statistical significance of  
 255 the circular correlation between the reconstructed and original color was tested by using the block-  
 256 permutation test with 24-sec block size and 30,000 times permutation (Adolf et al. 2014).

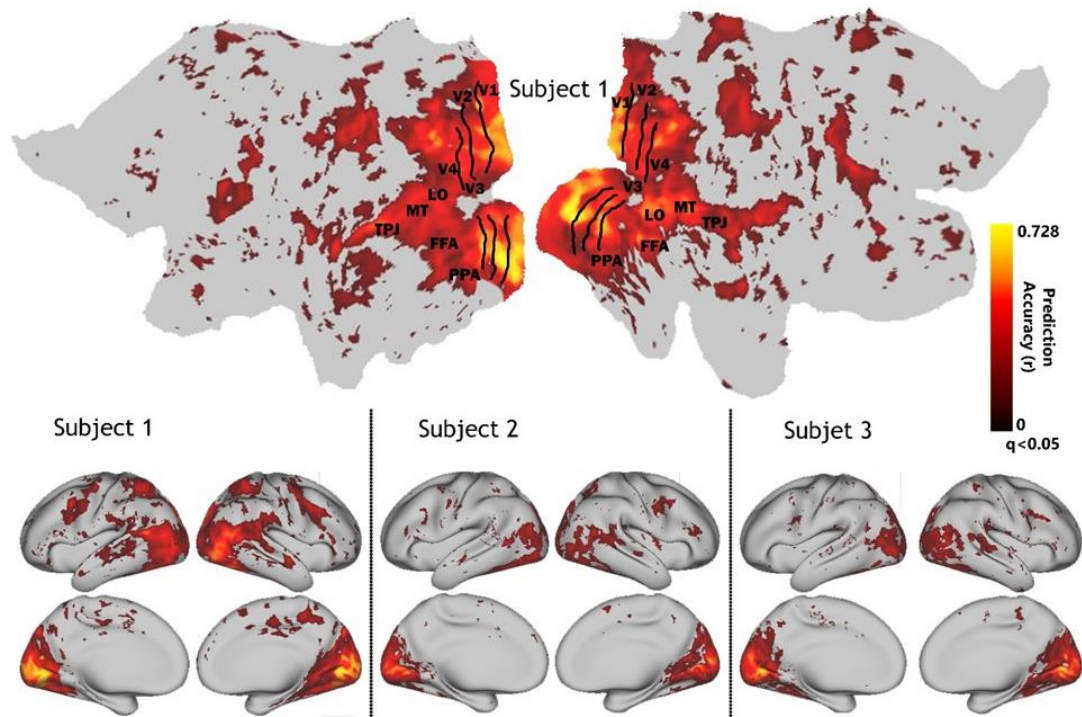

**Figure 3 | Prediction accuracy with VAE-based encoding model.** The accuracy was measured by the average Pearson's correlation coefficient ( $r$ ) between the predicted and the observed fMRI responses over five testing movies ( $q < 0.05$ , FDR correction). The result of subject 1 was shown with flat and stereoscopic views (top and bottom-left). Results of other subjects were shown with stereoscopic views.

257 We also compared the performance of the VAE-based decoding method with a previously  
258 published decoding method (Cowen, Chun and Kuhl 2014). For this alternative method (Cowen  
259 et al. 2014), we applied PCA to the training movie and obtained its principal components (or eigen-  
260 images), which explained 99% of its variance. The partial least square regression (PLSR)  
261 (Tenenhaus et al. 2005) was used to estimate the linear transformation from fMRI maps to eigen-  
262 images given the training movie. Using the estimated PLSR model, the fMRI data during the  
263 testing movie was first converted to representations in eigen-images, which in turn were  
264 recombined to reconstruct the visual stimuli (Cowen et al. 2014). As a variation of this PLSR-  
265 based model, we also explored the use of  $L_1$ -norm regularized optimization to estimate the linear  
266 transform from fMRI maps to eigen-images, in a similar way as used for the training of our  
267 decoding model (see Eq. (7)).

268 We also explored whether the VAE-based decoding models could be generalized across  
269 subjects. For this purpose, we used the decoding model trained from one subject to decode the  
270 fMRI data observed from the other subjects while watching the testing movie.

271

## 272 Results

### 273 *VAE provided vector representations of natural images*

274 By design, the VAE aimed to form a compressed and generalized vector representation of  
275 any natural image. In VAE, the encoder converted any natural image into 1,024 independent latent  
276 variables; the decoder reconstructed the image from the latent variables (Fig. 2.A). After training  
277 it with >2 million natural images in a wide range of categories, the VAE could regenerate natural  
278 images without significant loss in image content, structure and color, albeit blurred details (Fig.  
279 2B). Note that the VAE-generated images showed comparable quality for different types of input  
280 images (Fig. 2.B). In this sense, the latent representations in the VAE were generalizable across  
281 various types of visual objects, or their combinations.

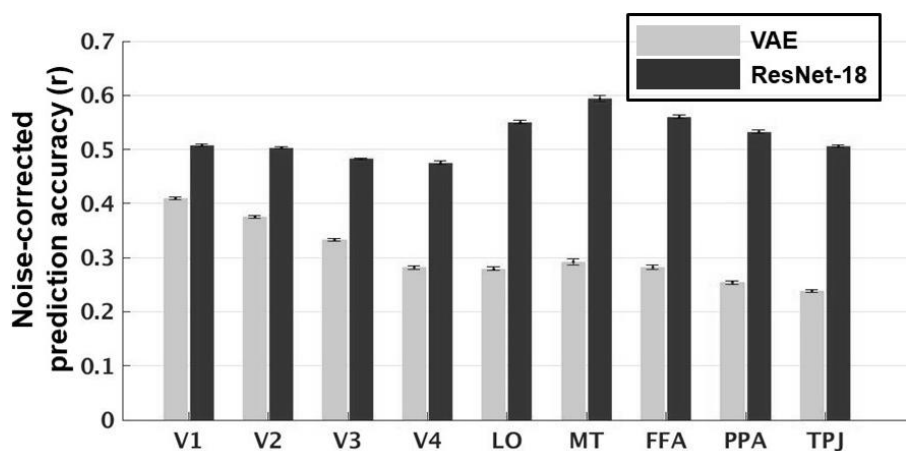

**Figure 4 | Model comparison with group prediction accuracies averaged within different ROIs.** Each bar represented the mean  $\pm$  SE of the prediction accuracy (noise-corrected Pearson's correlation coefficient averaged over 5 testing movies) across voxels within a ROI and across subjects. Results from VAE were shown with light color, with gradually decreasing accuracies from low level to high level. Results from ResNet-18 were shown with dark color, with accuracies in high level ROIs generally higher than those of low level ROIs.

## 282 *VAE predicted movie-induced cortical responses of visual cortex*

283 Given natural movies as visual input, we further asked whether and to what extent the  
284 model dynamics in VAE could be used to model and predict the movie-induced cortical responses.  
285 Specifically, a linear regression model was trained separately for each voxel by optimally fitting  
286 the voxel response time series to a training movie as a linear combination of VAE's unit responses  
287 to the movie. Then, the trained voxel-wise encoding model was tested with a new testing movie  
288 (not used for training) to evaluate its prediction accuracy (i.e. the correlation between the predicted  
289 and measured fMRI responses). We found significantly reliable predictions ( $q < 0.05$ , FDR  
290 correction) based on VAE-encoding model in a reasonable fraction of cortical areas (Fig. 3). The  
291 primary visual area (V1) showed highest prediction accuracy and intermediate visual areas  
292 (V2/V3/V4) were also predictable but the prediction accuracy was decreasing gradually, either  
293 along ventral or dorsal stream (Fig. 3). The VAE-predictable areas extended to a relatively larger  
294 scope when more data (~12-hour movie) were used for training the encoding models in Subject 1  
295 than Subject 2 & 3 for whom less training data (2.5-hour movie) were available.

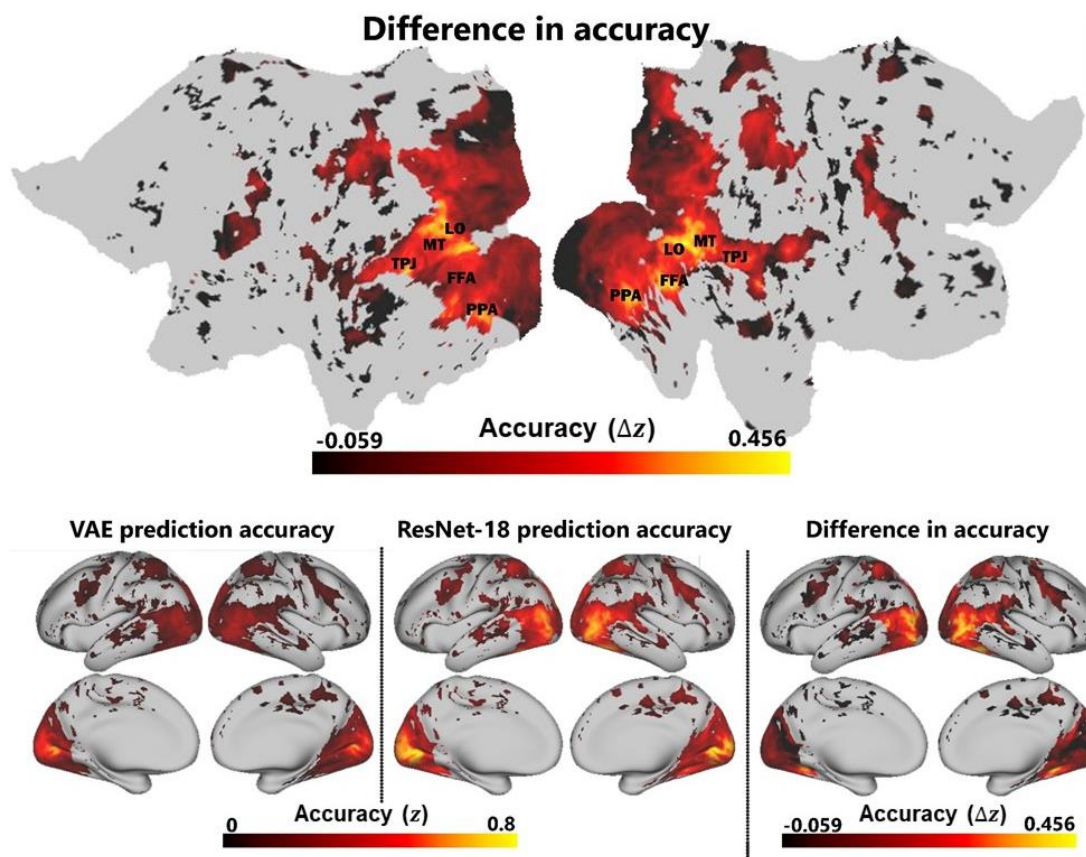

**Figure 5 | Comparing encoding prediction accuracy of VAE and ResNet-18.** The voxel-wise correlation coefficient was transformed to z-score through Fisher transformation. The z-scores of VAE based encoding model ( $z_{VAE}$ ), ResNet-18 based encoding model ( $z_{Res}$ ) and their difference ( $\Delta z = z_{Res} - z_{VAE}$ ) were shown.

## 296 *Comparing prediction accuracies between VAE and ResNet-18 based encoding models*

297 VAE based encoding model explained visual area activities with significant accuracies.  
298 Furthermore, an investigation was given to compare VAE and ResNet-18, addressing their relative  
299 prediction performance. Fig. 4 showed prediction accuracies of different ROIs based on two  
300 models. VAE showed the highest prediction accuracy for V1, and other accuracies gradually  
301 decreased from intermediate visual levels (V2/V3) to higher levels. Differently, ResNet-18 showed  
302 higher accuracies for high level ROIs (LO/MT/FFA/PPA/TPJ) than early visual areas. As for the  
303 accuracy difference, VAE provided similar performance to ResNet-18 in V1, but was gradually  
304 outperformed by ResNet-18 to a significant extent in ROIs of high levels.

305 We also tested the voxel-wise accuracy difference between two models. In this sense, the  
306 correlation coefficient of each voxel was transformed to z score. Then the differences between  
307 VAE based z scores and ResNet-18 based z scores were calculated. Generally, ResNet-18 gave  
308 better predictions than VAE for most of the voxels. Fig. 5 indicated a gradient of the z score  
309 subtraction: for early visual areas, prediction performance of VAE was similar to or slightly lower  
310 than ResNet-18; for high-level visual areas, stronger performance gap was found, suggesting that  
311 features from an unsupervised model might not be enough to explain voxel dynamics especially  
312 as the cortical level goes higher.

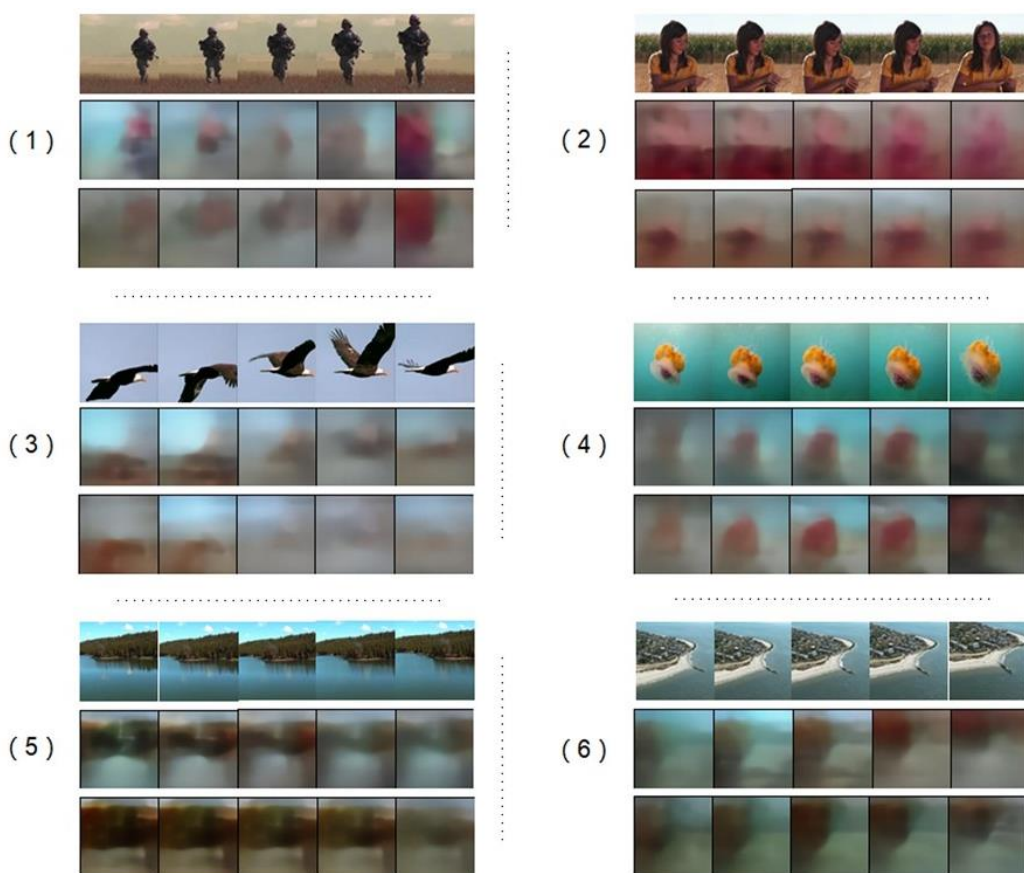

**Figure 6 | Reconstruction result and evaluation.** Reconstruction results of 6 different movie clips were shown. In each group, the first line showed original movie frames and the second line showed within-subject reconstruction. For cross-subject reconstruction, the decoding model was trained from subject 1 and results of subject 2 (clips 1, 2 & 3) and 3 (clips 4, 5 & 6) were shown on the third line.

### 313 *Direct visual reconstruction through decoding latent representation from the brain*

314 To see how well could the VAE model match to the brain, another way was to evaluate  
315 how well could the latent variables predicted from fMRI signals fit the generative model of VAE  
316 and reconstruct the visual input. We estimated the latent variables on visual stimuli from fMRI  
317 signals and fed the latent representation to VAE decoder. The reconstructed results generally  
318 reflected structure information of original input, including relative position and shape information  
319 of objects in the scene (Fig. 6). During the transition of consecutive movie clips, the reconstructed  
320 frames seemed to be unclear and affected by the content of both nearby clips. Inside the same  
321 continuous clip the result looks more stable and better. For the entire reconstructed movie frames  
322 of all 3 subjects, please see the enclosed video.

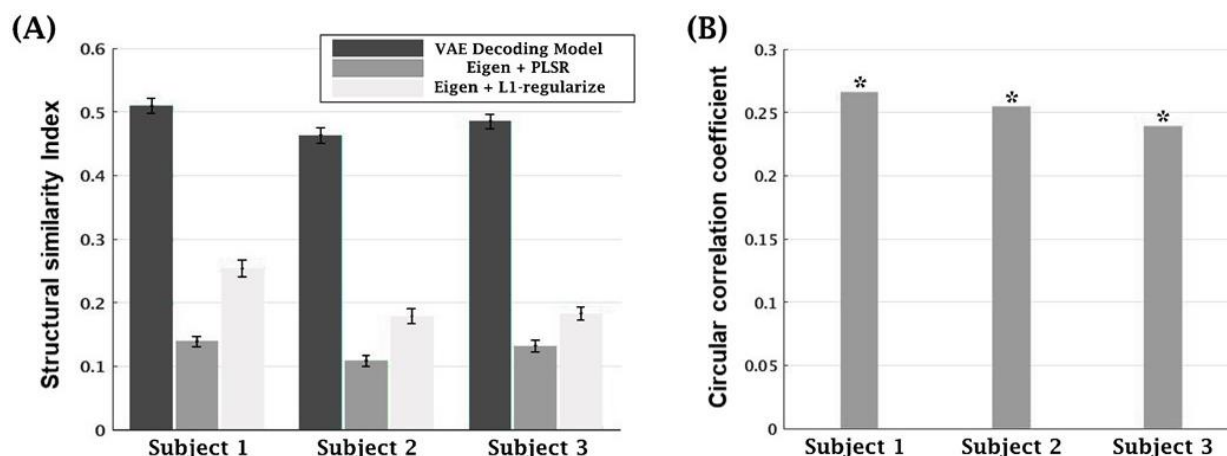

**Figure 7 | Quantitative evaluation of reconstruction. (A) Comparison of structural similarity index (SSIM).** SSIM scores of VAE-based decoding model and control models were compared for all 3 subjects. Each bar represented mean  $\pm$  SE SSIM score over all frames in the testing movie. **(B) Color component correlation.** The circular correlation coefficient between original and reconstructed hue components was calculated and the p-value was given through permutation test (\*,  $p < 0.001$ ).

323 We also gave a quantitative measurement and comparison of the model's performance on  
324 structural similarity. Given the decoding model and two control models, the structural similarity  
325 between reconstructed frames and visual inputs was evaluated using Structure Similarity Index  
326 (SSIM) (Wang et al. 2004). Fig. 7A indicated that the mean SSIM score of the decoding model  
327 was higher than the control models (pair sample t-test,  $p < 0.001$ ) for each subject, suggesting the  
328 decoding model could get higher group-averaged SSIM score and reconstruct with better structural  
329 similarity. The visualization of reconstruction result intuitively showed the retained color  
330 information of original frames. For example, the reconstructed frame of the jellyfish (clips indexed  
331 4 in Fig. 6) showed the color of orange, blue and cyan corresponding to true frame. To give a  
332 quantitative measurement, we evaluated the circular correlation of hue components with  
333 permutation test (Fig. 7B). For Subject 1, 2 & 3, the correlation coefficient values for all frames  
334 were 0.2657, 0.2544 & 0.2392 respectively (permutation test,  $p < 0.001$  for all three subjects, no  
335 correction), suggesting that color variations within or across reconstructed frames reflected the  
336 color fluctuations shown by the visual stimuli.

337 The decoding model was transferable among subjects. We decoded fMRI signals of Subject  
338 2&3 based on the decoding model trained from Subject 1 (Fig 6). The reconstruction result still  
339 retained information about structural, shape & color variation of objects and scenes in original  
340 frames.

341

## 342 **Discussion**

### 343 *Extending learning rules for modeling visual cortex*

344 Recently a growing body of literatures have used supervised deep-learning approaches to  
345 model and understand cortical representations during natural vision, yielding state-of-art  
346 performance for neural encoding and representational modeling (Yamins and DiCarlo 2016, Guclu  
347 and van Gerven 2015, Eickenberg et al. 2017, Cichy et al. 2016, Wen et al. 2017b, Shi et al. 2017),  
348 experimental paradigm simulation (Wen et al. 2017a, Eickenberg et al. 2017), visualizing single-  
349 voxel representation (Wen et al. 2017b) and neural decoding (Horikawa and Kamitani 2017, Wen  
350 et al. 2017b). This study extends previous findings by using an unsupervised inference model to  
351 explain cortical activities, focusing on modeling the unsupervised inference attribute of human  
352 brain.

353 In this study, the VAE-predictable voxels cover a large portion of the visual cortex (Fig.  
354 3), suggesting that unsupervised inference is a compelling learning principle to drive brain-  
355 explanatory computational models. Beyond that, one interesting finding of this study is the  
356 encoding accuracy contrast between VAE and supervised CNN. While supervised CNN explains  
357 sufficient variance over nearly the entire visual cortex, VAE shows comparable encoding  
358 performance only in primary visual area. This is consistent with a previous finding which indicates  
359 that explaining inferior temporal (IT) cortex requires computational features trained through  
360 supervised learning (Khaligh-Razavi and Kriegeskorte 2014). Our result further suggests that the  
361 unsupervised learning better matches low level visual areas rather than high level visual areas,  
362 while CNN with supervised training matches both well and is more exclusively important for  
363 explaining high level visual areas.

### 364 *Accumulating evidence for analysis-by-synthesis hypothesis with natural stimuli*

365 In the hypothesized “analysis by synthesis” theory of visual processing, the top-down  
366 generative component supports the bottom-up processing for inferring the causes of visual input.  
367 (Yuille and Kersten 2006, Friston 2010). Previous experimental studies have been accumulating  
368 evidences for “analysis by synthesis” hypothesis, including single-cell-like receptive fields (Rao  
369 and Ballard 1999), neural suppression due to stimulus predictability (Summerfield et al. 2008,  
370 Alink et al. 2010) and visual mismatch negativity (Wacongne, Changeux and Dehaene 2012,  
371 Garrido et al. 2009). These are all based on artificial visual stimuli instead of natural visual stimuli.  
372 However, it has been suggested that one important aspect of real inference systems is to deal with  
373 the complexities and ambiguities of visual information in natural world (Yuille and Kersten 2006).  
374 Therefore, this study attempts to evaluate the VAE based encoding and decoding models especially  
375 with natural visual stimuli.

376 Based on VAE computational model, we evaluate the inference property of natural vision  
377 through two phases: 1) While the model is driven by unsupervised inference, the unit activities of  
378 the whole model can jointly model and predict cortical dynamics, yielding similar or related

379 learning rules in the significantly predicted areas; 2) The inference result of the computational  
380 model, latent variables which represent inferred causes, can be directly extracted from cortical  
381 activities and tested for visual reconstruction. The regression techniques for both 1) and 2) are  
382 chosen to be linear because we want to guarantee that the encoding and decoding performances  
383 are contributed by the similar representations of the model to the brain, instead of the added  
384 regression. The encoding results match well to early visual areas (Fig. 5), suggesting the similar  
385 visual representations shared by the model dynamics and cortical responses. The decoding results  
386 show that the extracted latent representations from brain can support visual reconstruction (Fig.  
387 6), with the performance better than linear reconstruction methods (Fig. 7A), and can likely retain  
388 color information of the original visual input (Fig. 7B). One surprising finding is that the decoding  
389 model keeps comparable performance after transferred across subjects, suggesting that different  
390 individuals organize cortical representations of visual cause information in a similar way. This  
391 similarity is likely to result from unsupervised inference representations because different  
392 individuals have different supervised learning experience and supervision knowledge, but the  
393 factors generating the visual world might be similar over diverse circumstances.

### 394 *Towards generalizable visual stimuli reconstruction*

395 For decoding cortical activities, the built-in decoder of VAE enables a clear, independent  
396 and generalizable way to reconstruct visual input. Previous brain decoding studies mostly generate  
397 reconstruction in certain domain rather than diverse natural input, including edge orientation  
398 (Kamitani and Tong 2005), faces (Cowen et al. 2014, Nestor, Plaut and Behrmann 2016, Güçlütürk  
399 et al. 2017), contrast patterns (Miyawaki et al. 2008), digits (van Gerven, de Lange and Heskes  
400 2010b, Du et al. 2017) and words (Schoenmakers et al. 2013). As for natural visual reconstruction,  
401 Bayesian method has been used to combine the structure encoding model, the semantic encoding  
402 model and image prior information together to have accurate reconstruction result on natural  
403 images (Naselaris et al. 2009). The Bayesian model is further extended with motion-energy filter  
404 to reconstruct natural movies (Nishimoto et al. 2011). However, using image prior information  
405 requires sampling from a large dataset of natural images and the reconstruction is likely to  
406 correspond to an image that is already in the dataset. Therefore, the method potential is limited if  
407 the purview of the content of the reconstruction bank is unknown. VAE-based decoding method  
408 do not rely on prior samples because the nonlinear mapping from latent variables to the input is  
409 provided by the VAE decoder generalized from millions of training samples, without requiring  
410 best-matching image or other kinds of prior information.

411 Some recent studies have proposed generative methods for visual reconstruction. Deep  
412 belief network has been used to model hierarchical binary latent causes (van Gerven et al. 2010a).  
413 Then the decoding process is consisting of a conditional sampling step to estimate the top-level  
414 associative states from cortical activities, and an unconditional sampling step to propagate  
415 expectations back to input layer. One study uses deep generative multi-view model to analyze  
416 brain response and visual stimulus together. In this regard, visual reconstruction becomes Bayesian  
417 inference of missing view in a multi-view latent variable model (Du et al. 2017). Besides, another  
418 study introduces perceptual similarity metrics to face reconstruction (Güçlütürk et al. 2017),  
419 proposing adversarial training for neural decoding. Our study is complementary to previous  
420 generative reconstruction methods for both the application scenario and the model principle. From  
421 the application phase, we showed the feasibility of using generative model to reconstruct dynamic  
422 natural movies, which is also promising for natural image reconstruction; From the theoretical  
423 modeling phase, VAE framework can extend to a wide range of model architectures and is easier



424 to maintain tractability, compared with deep belief networks (Goodfellow, Bengio and Courville  
425 2016). Generally, VAE shows a light and generalizable framework for reconstructing diverse  
426 natural movies, and could potentially be extended with other deep learning frameworks. We  
427 hypothesize that the integration of multiple generative techniques (especially the techniques  
428 mentioned above including adversarial training and extended Bayesian inference methods) would  
429 integrate the merits of different models and open a new avenue towards generalizable  
430 reconstruction on diverse natural sensations.

### 431 *Future work*

432 This work extends computational modeling for movie-induced cortical responses from  
433 supervised CNNs to an unsupervised inference model, and reconstructs dynamic natural vision  
434 with a generalizable framework. As for model architecture, biological inference systems are likely  
435 to have hierarchically organized sensory causes (Friston 2010) and updating schemes with  
436 temporal information (Friston and Kiebel 2009, Huang and Rao 2011). VAE processes static  
437 images and can only serve as a spatial-temporally flattened inference system with end-to-end  
438 model architecture (Kingma and Welling 2013). Therefore, an improved inference model with  
439 spatial and temporal hierarchy would be needed towards more inference-theory-plausible neural  
440 coding. As for visual reconstruction, previous studies have suggested that feature maps of  
441 supervised CNN can be predicted from brain activities (Horikawa and Kamitani 2017, Wen et al.  
442 2017b). Since latent variables and feature maps both retain information of visual input, it would  
443 be interesting to integrate feature estimation methods with generative models to augment visual  
444 reconstruction, and even enable the model to decode mental states, imagery or dreams. Besides,  
445 another property of variational autoencoder is feature disentangling (Kingma and Welling 2013,  
446 Higgins et al. 2016). However, to our knowledge, in current AI literatures there is no report on  
447 disentangling the factors of natural images by using VAE. A technical improvement on this would  
448 provide potential avenues to analyze the feature disentangling property inside human brain  
449 (DiCarlo, Zoccolan and Rust 2012).

450

### 451 **Reference**

- 452 Adolf, D., S. Weston, S. Baecke, M. Luchtman, J. Bernarding & S. Kropf (2014) Increasing the reliability  
453 of data analysis of functional magnetic resonance imaging by applying a new blockwise  
454 permutation method. *Frontiers in neuroinformatics*, 8, 72.
- 455 Alink, A., C. M. Schwiedrzik, A. Kohler, W. Singer & L. Muckli (2010) Stimulus predictability reduces  
456 responses in primary visual cortex. *Journal of Neuroscience*, 30, 2960-2966.
- 457 Barlow, H. B. (1989) Unsupervised learning. *Neural computation*, 1, 295-311.
- 458 Bastos, A. M., W. M. Usrey, R. A. Adams, G. R. Mangun, P. Fries & K. J. Friston (2012) Canonical  
459 microcircuits for predictive coding. *Neuron*, 76, 695-711.
- 460 Berens, P. (2009) CircStat: a MATLAB toolbox for circular statistics. *J Stat Softw*, 31, 1-21.
- 461 Cichy, R. M., A. Khosla, D. Pantazis, A. Torralba & A. Oliva (2016) Comparison of deep neural networks to  
462 spatio-temporal cortical dynamics of human visual object recognition reveals hierarchical  
463 correspondence. *Sci Rep*, 6, 27755.
- 464 Cowen, A. S., M. M. Chun & B. A. Kuhl (2014) Neural portraits of perception: reconstructing face images  
465 from evoked brain activity. *Neuroimage*, 94, 12-22.
- 466 DiCarlo, J. J., D. Zoccolan & N. C. Rust (2012) How does the brain solve visual object recognition? *Neuron*,  
467 73, 415-434.

- 468 Doersch, C. (2016) Tutorial on variational autoencoders. *arXiv preprint arXiv:1606.05908*.
- 469 Du, C., C. Du & H. He (2017) Sharing deep generative representation for perceived image reconstruction  
470 from human brain activity. *arXiv preprint arXiv:1704.07575*.
- 471 Eickenberg, M., A. Gramfort, G. Varoquaux & B. Thirion (2017) Seeing it all: Convolutional network layers  
472 map the function of the human visual system. *Neuroimage*, 152, 184-194.
- 473 Friston, K. (2010) The free-energy principle: a unified brain theory? *Nat Rev Neurosci*, 11, 127-38.
- 474 Friston, K. & S. Kiebel (2009) Predictive coding under the free-energy principle. *Philos Trans R Soc Lond B*  
475 *Biol Sci*, 364, 1211-21.
- 476 Garrido, M. I., J. M. Kilner, K. E. Stephan & K. J. Friston (2009) The mismatch negativity: a review of  
477 underlying mechanisms. *Clinical neurophysiology*, 120, 453-463.
- 478 Glasser, M. F., S. N. Sotiropoulos, J. A. Wilson, T. S. Coalson, B. Fischl, J. L. Andersson, J. Xu, S. Jbabdi, M.  
479 Webster & J. R. Polimeni (2013) The minimal preprocessing pipelines for the Human  
480 Connectome Project. *Neuroimage*, 80, 105-124.
- 481 Goodfellow, I., Y. Bengio & A. Courville. 2016. *Deep learning*. MIT press.
- 482 Gregor, K., I. Danihelka, A. Graves, D. J. Rezende & D. Wierstra (2015) DRAW: A recurrent neural  
483 network for image generation. *arXiv preprint arXiv:1502.04623*.
- 484 Guclu, U. & M. A. van Gerven (2015) Deep Neural Networks Reveal a Gradient in the Complexity of  
485 Neural Representations across the Ventral Stream. *J Neurosci*, 35, 10005-14.
- 486 Güçlütürk, Y., U. Güçlü, K. Seeliger, S. Bosch, R. van Lier & M. van Gerven (2017) Deep adversarial neural  
487 decoding. *arXiv preprint arXiv:1705.07109*.
- 488 He, K., X. Zhang, S. Ren & J. Sun. 2016. Deep residual learning for image recognition. In *Proceedings of*  
489 *the IEEE Conference on Computer Vision and Pattern Recognition*, 770-778.
- 490 Higgins, I., L. Matthey, X. Glorot, A. Pal, B. Uria, C. Blundell, S. Mohamed & A. Lerchner (2016) Early  
491 visual concept learning with unsupervised deep learning. *arXiv preprint arXiv:1606.05579*.
- 492 Hinton, G. E., P. Dayan, B. J. Frey & R. M. Neal (1995) The Wake-Sleep Algorithm for Unsupervised  
493 Neural Networks. *Science*, 268, 1158-1161.
- 494 Horikawa, T. & Y. Kamitani (2017) Generic decoding of seen and imagined objects using hierarchical  
495 visual features. *Nat Commun*, 8, 15037.
- 496 Huang, Y. & R. P. N. Rao (2011) Predictive coding. *Wiley Interdisciplinary Reviews: Cognitive Science*, 2,  
497 580-593.
- 498 Hubel, D. H. & T. N. Wiesel (1962) Receptive fields, binocular interaction and functional architecture in  
499 the cat's visual cortex. *J Physiol*, 160, 106-54.
- 500 Jammalamadaka, S. R. & A. Sengupta. 2001. *Topics in circular statistics*. World Scientific.
- 501 Kamitani, Y. & F. Tong (2005) Decoding the visual and subjective contents of the human brain. *Nature*  
502 *neuroscience*, 8, 679-685.
- 503 Kay, K. N., T. Naselaris, R. J. Prenger & J. L. Gallant (2008) Identifying natural images from human brain  
504 activity. *Nature*, 452, 352-5.
- 505 Kay, K. N., J. Winawer, A. Mezer & B. A. Wandell (2013) Compressive spatial summation in human visual  
506 cortex. *Journal of neurophysiology*, 110, 481-494.
- 507 Khaligh-Razavi, S.-M. & N. Kriegeskorte (2014) Deep supervised, but not unsupervised, models may  
508 explain IT cortical representation. *PLoS computational biology*, 10, e1003915.
- 509 Kietzmann, T. C., P. McClure & N. Kriegeskorte (2017) Deep Neural Networks In Computational  
510 Neuroscience. *bioRxiv*, 133504.
- 511 Kingma, D. & J. Ba (2014) Adam: A method for stochastic optimization. *arXiv preprint arXiv:1412.6980*.
- 512 Kingma, D. P. & M. Welling (2013) Auto-encoding variational bayes. *arXiv preprint arXiv:1312.6114*.
- 513 Kriegeskorte, N. (2015) Deep Neural Networks: A New Framework for Modeling Biological Vision and  
514 Brain Information Processing. *Annu Rev Vis Sci*, 1, 417-446.

- 515 Krizhevsky, A., I. Sutskever & G. E. Hinton. 2012. ImageNet Classification with Deep Convolutional Neural  
516 Networks. In *Advances in Neural Information Processing Systems*, 1097-1105. Chicago.
- 517 LeCun, Y., Y. Bengio & G. Hinton (2015) Deep learning. *Nature*, 521, 436-44.
- 518 Lotter, W., G. Kreiman & D. Cox (2016) Deep predictive coding networks for video prediction and  
519 unsupervised learning. *arXiv preprint arXiv:1605.08104*.
- 520 Mirza, M., A. Courville & Y. Bengio (2016) Generalizable Features From Unsupervised Learning. *arXiv*  
521 *preprint arXiv:1612.03809*.
- 522 Miyawaki, Y., H. Uchida, O. Yamashita, M.-a. Sato, Y. Morito, H. C. Tanabe, N. Sadato & Y. Kamitani  
523 (2008) Visual image reconstruction from human brain activity using a combination of multiscale  
524 local image decoders. *Neuron*, 60, 915-929.
- 525 Nair, V. & G. E. Hinton. 2010. Rectified linear units improve restricted boltzmann machines. In  
526 *Proceedings of the 27th international conference on machine learning (ICML-10)*, 807-814.
- 527 Naselaris, T., K. N. Kay, S. Nishimoto & J. L. Gallant (2011) Encoding and decoding in fMRI. *Neuroimage*,  
528 56, 400-10.
- 529 Naselaris, T., R. J. Prenger, K. N. Kay, M. Oliver & J. L. Gallant (2009) Bayesian reconstruction of natural  
530 images from human brain activity. *Neuron*, 63, 902-915.
- 531 Nestor, A., D. C. Plaut & M. Behrmann (2016) Feature-based face representations and image  
532 reconstruction from behavioral and neural data. *Proceedings of the National Academy of*  
533 *Sciences*, 113, 416-421.
- 534 Nishimoto, S., A. T. Vu, T. Naselaris, Y. Benjamini, B. Yu & J. L. Gallant (2011) Reconstructing visual  
535 experiences from brain activity evoked by natural movies. *Curr Biol*, 21, 1641-6.
- 536 Rao, R. P. N. & D. H. Ballard (1999) Predictive coding in the visual cortex: a functional interpretation of  
537 some extra-classical receptive-field effects. *Nature Neuroscience*, 2, 79-87.
- 538 Russakovsky, O., J. Deng, H. Su, J. Krause, S. Satheesh, S. Ma, Z. Huang, A. Karpathy, A. Khosla & M.  
539 Bernstein (2015) Imagenet large scale visual recognition challenge. *International Journal of*  
540 *Computer Vision*, 115, 211-252.
- 541 Salin, P. A. & J. Bullier (1995) Corticocortical connections in the visual system: structure and function.  
542 *Physiol Rev*, 75, 107-54.
- 543 Schoenmakers, S., M. Barth, T. Heskes & M. van Gerven (2013) Linear reconstruction of perceived  
544 images from human brain activity. *NeuroImage*, 83, 951-961.
- 545 Shi, J., H. Wen, Y. Zhang, K. Han & Z. Liu (2017) Deep Recurrent Neural Network Reveals a Hierarchy of  
546 Process Memory during Dynamic Natural Vision. *bioRxiv*, 177196.
- 547 Simonyan, K. & A. Zisserman (2014) Very deep convolutional networks for large-scale image recognition.  
548 *arXiv preprint arXiv:1409.1556*.
- 549 Summerfield, C., E. H. Trittschuh, J. M. Monti, M.-M. Mesulam & T. Egner (2008) Neural repetition  
550 suppression reflects fulfilled perceptual expectations. *Nature neuroscience*, 11, 1004-1006.
- 551 Tenenhaus, M., V. E. Vinzi, Y.-M. Chatelin & C. Lauro (2005) PLS path modeling. *Computational statistics*  
552 *& data analysis*, 48, 159-205.
- 553 van Gerven, M. A., F. P. de Lange & T. Heskes (2010a) Neural decoding with hierarchical generative  
554 models. *Neural Comput*, 22, 3127-42.
- 555 van Gerven, M. A. J., F. P. de Lange & T. Heskes (2010b) Neural decoding with hierarchical generative  
556 models. *Neural Computation*, 22, 3127-3142.
- 557 van Hateren, J. H. & A. van der Schaaf (1998) Independent component filters of natural images  
558 compared with simple cells in primary visual cortex. *Proc Biol Sci*, 265, 359-66.
- 559 Wacongne, C., J.-P. Changeux & S. Dehaene (2012) A neuronal model of predictive coding accounting for  
560 the mismatch negativity. *Journal of Neuroscience*, 32, 3665-3678.
- 561 Wang, Z., A. C. Bovik, H. R. Sheikh & E. P. Simoncelli (2004) Image quality assessment: from error  
562 visibility to structural similarity. *IEEE transactions on image processing*, 13, 600-612.

- 563 Wen, H., J. Shi, W. Chen & Z. Liu (2017a) Deep Residual Network Reveals a Nested Hierarchy of  
564 Distributed Cortical Representation for Visual Categorization. *bioRxiv*, 151142.
- 565 Wen, H., J. Shi, Y. Zhang, K.-H. Lu, J. Cao & Z. Liu (2017b) Neural Encoding and Decoding with Deep  
566 Learning for Dynamic Natural Vision. *Cerebral Cortex*.
- 567 Wu, M. C., S. V. David & J. L. Gallant (2006) Complete functional characterization of sensory neurons by  
568 system identification. *Annu Rev Neurosci*, 29, 477-505.
- 569 Yamins, D. L., H. Hong, C. F. Cadieu, E. A. Solomon, D. Seibert & J. J. DiCarlo (2014) Performance-  
570 optimized hierarchical models predict neural responses in higher visual cortex. *Proc Natl Acad*  
571 *Sci U S A*, 111, 8619-24.
- 572 Yamins, D. L. K. & J. J. DiCarlo (2016) Using goal-driven deep learning models to understand sensory  
573 cortex. *Nature Neuroscience*, 19, 356-365.
- 574 Yuille, A. & D. Kersten (2006) Vision as Bayesian inference: analysis by synthesis? *Trends Cogn Sci*, 10,  
575 301-8.
